# Supplementary material for: Gut mucus layer degradation is associated with aggressive cervical cancer phenotype
Source: Research Square preprint supplement (doi:10.21203/rs.3.rs-796525/v1), 2021-12-30
Supplement: Supplementary file 1 [file 8f97ff2b48eb3e233b49e9ea.xlsx]

## Sheet: Table S1
Table S1. Software tools/packages used in the shotgun metagenome sequencing data analysis workflow
Software	Citation	Source
FastQC (version 0.11.8)		https://www.bioinformatics.babraham.ac.uk/projects/fastqc
FastQ_Screen (version 0.14.0)	(Wingett and Andrews 2018)	https://www.bioinformatics.babraham.ac.uk/projects/fastq_screen
BBDuk/BBTools (version 20190109)		https://jgi.doe.gov/data-and-tools/bbtools
BBMap/BBTools (version 20190109)		https://jgi.doe.gov/data-and-tools/bbtools
Bowtie2 (version 2.3.5)	(Langmead and Salzberg 2012)	https://github.com/BenLangmead/bowtie2
Samtools (version 1.9)	(H. Li et al. 2009)	https://github.com/samtools
IGGsearch (version 20190921)	(Nayfach et al. 2019)	https://github.com/snayfach/IGGsearch
MetaPhlAn2 (version 2.0) (mpa_v295_CHOCOPhlAn_201901)	(Truong et al. 2015)	https://bitbucket.org/biobakery/metaphlan2
MEGAHIT (version 1.2.8)	(D. Li et al. 2015)	https://github.com/voutcn/megahit
metaSPAdes (version 3.13.1)	(Nurk et al. 2017)	https://github.com/ablab/spades/releases
MetaBAT2 (version 20191004)	(Kang et al. 2019)	https://bitbucket.org/berkeleylab/metabat
Prodigal (version 2.6.3)	(Hyatt et al. 2010)	https://github.com/hyattpd/Prodigal
Diamond (version 0.9.24)	(Buchfink, Xie, and Huson 2015)	https://github.com/bbuchfink/diamond
KofamScan (version 1.1.0)	(Aramaki et al. 2020)	https://github.com/takaram/kofam_scan
CAT (version 20190719)	(von Meijenfeldt et al. 2019)	https://github.com/dutilh/CAT
HTSeq (version 0.11.0)	(Anders, Pyl, and Huber 2015)	https://github.com/simon-anders/htseq
Subread (version 1.6.3)	(Liao, Smyth, and Shi 2014)	http://subread.sourceforge.net
References
Anders, Simon, Paul Theodor Pyl, and Wolfgang Huber. 2015. “HTSeq—a Python Framework to Work with High-Throughput Sequencing Data.” Bioinformatics 31 (2): 166–69.
Aramaki, Takuya, Romain Blanc-Mathieu, Hisashi Endo, Koichi Ohkubo, Minoru Kanehisa, Susumu Goto, and Hiroyuki Ogata. 2020. “KofamKOALA: KEGG Ortholog Assignment Based on Profile HMM and Adaptive Score Threshold.” Bioinformatics 36 (7): 2251–52.
Buchfink, Benjamin, Chao Xie, and Daniel H. Huson. 2015. “Fast and Sensitive Protein Alignment Using DIAMOND.” Nature Methods 12 (1): 59.
Hyatt, Doug, Gwo-Liang Chen, Philip F LoCascio, Miriam L Land, Frank W Larimer, and Loren J Hauser. 2010. “Prodigal: Prokaryotic Gene Recognition and Translation Initiation Site Identification.” BMC Bioinformatics 11 (1): 119. https://doi.org/10.1186/1471-2105-11-119.
Kang, Dongwan D., Feng Li, Edward Kirton, Ashleigh Thomas, Rob Egan, Hong An, and Zhong Wang. 2019. “MetaBAT 2: An Adaptive Binning Algorithm for Robust and Efficient Genome Reconstruction from Metagenome Assemblies.” PeerJ 7: e7359.
Langmead, Ben, and Steven L Salzberg. 2012. “Fast Gapped-Read Alignment with Bowtie 2.” Nature Methods 9 (4): 357–59. https://doi.org/10.1038/nmeth.1923.
Li, Dinghua, Chi-Man Liu, Ruibang Luo, Kunihiko Sadakane, and Tak-Wah Lam. 2015. “MEGAHIT: An Ultra-Fast Single-Node Solution for Large and Complex Metagenomics Assembly via Succinct de Bruijn Graph.” Bioinformatics 31 (10): 1674–76.
Li, H., B. Handsaker, A. Wysoker, T. Fennell, J. Ruan, N. Homer, G. Marth, G. Abecasis, R. Durbin, and 1000 Genome Project Data Processing Subgroup. 2009. “The Sequence Alignment/Map Format and SAMtools.” Bioinformatics 25 (16): 2078–79. https://doi.org/10.1093/bioinformatics/btp352.
Liao, Yang, Gordon K. Smyth, and Wei Shi. 2014. “FeatureCounts: An Efficient General Purpose Program for Assigning Sequence Reads to Genomic Features.” Bioinformatics 30 (7): 923–30.
Meijenfeldt, FA Bastiaan von, Ksenia Arkhipova, Diego D. Cambuy, Felipe H. Coutinho, and Bas E. Dutilh. 2019. “Robust Taxonomic Classification of Uncharted Microbial Sequences and Bins with CAT and BAT.” Genome Biology 20 (1): 217.
Nayfach, Stephen, Zhou Jason Shi, Rekha Seshadri, Katherine S. Pollard, and Nikos C. Kyrpides. 2019. “New Insights from Uncultivated Genomes of the Global Human Gut Microbiome.” Nature 568 (7753): 505–10.
Nurk, Sergey, Dmitry Meleshko, Anton Korobeynikov, and Pavel A. Pevzner. 2017. “MetaSPAdes: A New Versatile Metagenomic Assembler.” Genome Research 27 (5): 824–34.
Truong, Duy Tin, Eric A. Franzosa, Timothy L. Tickle, Matthias Scholz, George Weingart, Edoardo Pasolli, Adrian Tett, Curtis Huttenhower, and Nicola Segata. 2015. “MetaPhlAn2 for Enhanced Metagenomic Taxonomic Profiling.” Nature Methods 12 (10): 902–3.
Wingett, Steven W., and Simon Andrews. 2018. “FastQ Screen: A Tool for Multi-Genome Mapping and Quality Control.” F1000Research 7 (September): 1338. https://doi.org/10.12688/f1000research.15931.2.

## Sheet: Table S2
Table S2. Clinicopathological characteristics of the study cohort
Pt	Cluster	Stage	Stage group	Cancer Type	Sample Site	Deceased/Alive	Age	Histology	Tumor_Size_MRI	AboveMean	Tumor_size_group	Node Level on PET	RFS_time	RFS_status	OS_status	OS_time
P337	LT	I	!/II	Cervical	Cervix	Alive	55	Squamous Carcinoma	1.8	0	S	External Iliac	16	0	0	16
P029	LT	II	!/II	Cervical	Cervix	Alive	40	Squamous Carcinoma	3.1	0	S	External Iliac	14	0	0	18
P012	ST	II	!/II	Cervical	Cervix	Alive	51	Adenocarcinoma	3.2	0	S	None	44	0	0	44
P013	ST	II	!/II	Cervical	Cervix	Alive	47	Adenocarcinoma	3.5	0	S	None	24	0	0	24
P014	ST	I	!/II	Cervical	Cervix	Alive	65	Adenocarcinoma	3.9	0	S	None	43	0	0	43
P333	ST	II	!/II	Cervical	Cervix	Alive	55	Squamous Carcinoma	3.9	0	S	External Iliac	23	1	0	23
P335	ST	II	!/II	Cervical	Cervix	Alive	29	Squamous Carcinoma	4	0	S	None	19	0	0	19
P315	LT	II	!/II	Cervical	Cervix	Alive	60	Adenocarcinoma	4.1	0	S	None	25	0	0	25
P006	LT	III	III/IV	Cervical	Cervix	Alive	43	Squamous Carcinoma	4.1	0	S	Common Iliac	31	1	1	48
P024	ST	II	!/II	Cervical	Cervix	Alive	49	Squamous Carcinoma	4.1	0	S	External Iliac	33	0	0	33
P027	LT	I	!/II	Cervical	Cervix	Alive	66	Squamous Carcinoma	4.2	0	S	Common Iliac	34	0	0	34
P022	ST	II	!/II	Cervical	Cervix	Alive	37	Squamous Carcinoma	4.2	0	S	External Iliac	28	0	0	28
P019	ST	II	!/II	Cervical	Cervix	Alive	48	Squamous Carcinoma	4.3	0	S	None	43	0	0	43
P015	ST	I	!/II	Cervical	Cervix	Deceased	36	Adenosquamous	4.4	0	S	External Iliac	9	1	1	14
P005	LT	II	!/II	Cervical	Cervix	Deceased	40	Adenocarcinoma	4.6	0	M	None	3	1	1	6
P340	ST	I	!/II	Cervical	Cervix	Alive	36	Squamous Carcinoma	4.7	0	M	Internal Iliac	16	0	0	16
P352	ST	NA	NA	Cervical	Cervix	NA	NA	NA	5	0	M	NA	NA	NA	NA	NA
P359	LT	II	!/II	Cervical	Cervix	Alive	46	Squamous Carcinoma	5.1	0	M	External Iliac	10	0	0	10
P008	LT	II	!/II	Cervical	Cervix	Alive	41	Adenocarcinoma	5.2	0	M	None	45	0	0	45
P018	ST	I	!/II	Cervical	Cervix	Alive	61	Squamous Carcinoma	5.3	0	M	Para-Aortic	41	0	0	41
P011	LT	I	!/II	Cervical	Cervix	Alive	38	Adenocarcinoma	5.4	0	M	None	41	0	0	41
P028	LT	II	!/II	Cervical	Cervix	Alive	54	Squamous Carcinoma	5.8	0	M	External Iliac	28	0	0	28
P329	LT	II	!/II	Cervical	Cervix	Alive	41	Adenosquamous	6	1	M	External Iliac	19	0	0	19
P007	LT	I	!/II	Cervical	Cervix	Alive	60	Squamous Carcinoma	6.3	1	M	Para-Aortic	9	0	0	9
P320	ST	II	!/II	Cervical	Cervix	Alive	38	Squamous Carcinoma	6.3	1	M	External Iliac	8	1	0	17
P354	LT	IV	III/IV	Cervical	Cervix	Deceased	46	Squamous Carcinoma	6.5	1	M	Internal Iliac	6	1	1	8
P003	LT	III	III/IV	Cervical	Cervix	Alive	32	Squamous Carcinoma	6.7	1	L	External Iliac	44	1	0	52
P020	LT	II	!/II	Cervical	Cervix	Alive	52	Squamous Carcinoma	6.8	1	L	Internal Iliac	3	0	0	3
P010	LT	III	III/IV	Cervical	Cervix	Alive	47	Squamous Carcinoma	7.1	1	L	Common Iliac	28	1	0	40
P302	LT	III	III/IV	Cervical	Cervix	Alive	71	Squamous Carcinoma	7.2	1	L	External Iliac	31	0	0	31
P323	LT	III	III/IV	Cervical	Cervix	Alive	61	Squamous Carcinoma	7.4	1	L	Common Iliac	5	0	0	5
P313	LT	II	!/II	Cervical	Cervix	Alive	52	Squamous Carcinoma	7.7	1	L	External Iliac	28	0	0	28
P332	ST	NA	NA	Cervical	Cervix	NA	NA	NA	7.7	1	L	NA	NA	NA	NA	NA
P021	LT	II	!/II	Cervical	Cervix	Deceased	42	Squamous Carcinoma	8.2	1	L	None	18	0	1	19
P025	LT	III	III/IV	Cervical	Cervix	Deceased	49	Squamous Carcinoma	8.3	1	L	External Iliac	6	1	1	9
P026	LT	IV	III/IV	Cervical	Cervix	Alive	72	Squamous Carcinoma	8.5	1	L	External Iliac	33	0	0	33
P338	ST	II	!/II	Cervical	Cervix	Alive	57	Squamous Carcinoma	8.7	1	L	Common Iliac	6	1	0	17
P330	LT	II	!/II	Cervical	Cervix	Alive	56	Squamous Carcinoma	9.1	1	L	Common Iliac	20	0	0	20
P318	LT	III	III/IV	Cervical	Cervix	Alive	42	Squamous Carcinoma	10	1	L	External Iliac	8	1	0	11
P030	LT	I	!/II	Cervical	Cervix	Alive	46	Adenocarcinoma	11.5	1	L	None	31	0	0	31
P351	LT	II	!/II	Cervical	Cervix	Alive	67	Squamous Carcinoma		NA		None	12	0	0	12

## Sheet: Table S3
Table S3. Functional richness of metagenomes identified in each patient of the study cohort
Pt	Gene predicted	Genes annotated, by KO	KO unique	Gene annotated, fraction	KO unique to annotated genes, fraction
P359	530823	136167	4703	0.256521	0.0345385
P330	327073	90284	4519	0.276036	0.0500532
P323	235040	55361	4516	0.235539	0.0815737
P318	198896	56283	4510	0.282977	0.0801308
P005	283162	71282	4397	0.251736	0.0616846
P026	352684	88328	4356	0.250445	0.0493162
P025	308573	77557	4353	0.251341	0.0561265
P028	334563	91936	4304	0.274794	0.0468152
P354	147913	43786	4203	0.296025	0.0959896
P003	261505	66685	4188	0.255005	0.0628027
P030	142908	38294	4142	0.267963	0.108163
P351	248207	70447	4112	0.283824	0.0583701
P335	138597	26503	3761	0.191223	0.141908
P302	481521	123102	3648	0.255652	0.029634
P029	344558	82737	3648	0.240125	0.0440915
P020	329172	77465	3581	0.235333	0.0462273
P337	425927	104649	3545	0.245697	0.0338751
P332	155661	46426	3529	0.298251	0.0760134
P012	207473	44702	3522	0.215459	0.0787884
P320	398843	95297	3490	0.238934	0.0366223
P027	423365	102541	3402	0.242205	0.033177
P315	382421	102910	3402	0.269101	0.033058
P333	342859	81444	3265	0.237544	0.0400889
P329	261477	62330	3245	0.238377	0.0520616
P007	227519	61891	3226	0.272026	0.0521239
P018	154276	28666	3214	0.18581	0.112119
P021	143373	27094	3164	0.188976	0.116779
P008	220378	56947	3150	0.258406	0.0553146
P006	184758	46793	2965	0.253266	0.0633642
P313	137692	35605	2900	0.258584	0.0814492
P340	207888	43451	2880	0.209012	0.0662816
P352	162731	49448	2766	0.303863	0.0559376
P010	86385	17118	2615	0.198159	0.152763
P338	126413	25146	2611	0.198919	0.103834
P022	94384	22220	2519	0.235421	0.113366
P024	115545	24689	2348	0.213674	0.0951031
P015	100213	16660	2137	0.166246	0.128271
P013	89927	18206	2115	0.202453	0.11617
P019	44815	6610	1528	0.147495	0.231165
P011	43249	4616	1470	0.106731	0.318458
P014	44093	2400	904	0.0544304	0.376667

## Sheet: Table S4
Table S4. Differentially abundant taxa identified by linear discriminant analysis (LDA) effect size (LEfSe) analysis between LTgroup- and ST-group
Taxa	Enriched in	LDA score, log2	p-value
.s__uncultured organism	L	2.35756	0.034491
k__Bacteria.p__Actinobacteria.c__Actinobacteria.o__Bifidobacteriales.f__Bifidobacteriaceae.g__Bifidobacterium.s__Bifidobacterium breve	L	2.18303	0.0404045
k__Bacteria.p__Actinobacteria.c__Coriobacteriia.o__Coriobacteriales.f__Coriobacteriaceae.g__Collinsella.s__Collinsella aerofaciens	L	2.11925	0.0317838
k__Bacteria.p__Actinobacteria.c__Coriobacteriia.o__Coriobacteriales.f__Coriobacteriaceae.g__Collinsella.s__Collinsellasp_60_9	L	2.10384	0.0160486
k__Bacteria.p__Bacteroidetes.c__Bacteroidia.o__Bacteroidales.f__Bacteroidaceae.g__Bacteroides.s__Bacteroides fluxus	L	2.06051	0.0265447
k__Bacteria.p__Bacteroidetes.c__Bacteroidia.o__Bacteroidales.f__Bacteroidaceae.g__Bacteroides.s__Bacteroides fragilisCAG	L	2.55813	0.0345604
k__Bacteria.p__Bacteroidetes.c__Bacteroidia.o__Bacteroidales.f__Barnesiellaceae.g__Barnesiella.s__Barnesiellasp_An22	L	2.20513	0.00718245
k__Bacteria.p__Bacteroidetes.c__Bacteroidia.o__Bacteroidales.f__Rikenellaceae.g__Alistipes.s__Alistipessp_3BBH6	L	2.18662	0.00561052
k__Bacteria.p__Firmicutes.c__Bacilli.o__Bacillales.g__Gemella.s__Gemellaa saccharolytica	L	2.39782	0.0352927
k__Bacteria.p__Firmicutes.c__Bacilli.o__Lactobacillales.f__Streptococcaceae.g__Streptococcus.s__Streptococcussp_GMD6S	L	2.25262	0.0462102
k__Bacteria.p__Firmicutes.c__Clostridia	L	4.13514	0.00506597
k__Bacteria.p__Firmicutes.c__Clostridia.o__Clostridiales	L	5.72978	0.000938867
k__Bacteria.p__Firmicutes.c__Clostridia.o__Clostridiales.f__Clostridiaceae.g__Clostridium.s__Clostridiumhydrogeniformans	L	2.53936	0.0345604
k__Bacteria.p__Firmicutes.c__Clostridia.o__Clostridiales.f__Clostridiaceae.g__Clostridium.s__Clostridiumsp_CL_6	L	2.10724	0.0160486
k__Bacteria.p__Firmicutes.c__Clostridia.o__Clostridiales.f__Clostridiaceae.g__Clostridium.s__Clostridiumsp_OM05_9	L	2.27318	0.0160486
k__Bacteria.p__Firmicutes.c__Clostridia.o__Clostridiales.f__Clostridiaceae.g__Clostridium.s__Clostridiumsp_SS2_1	L	2.22909	0.0160486
k__Bacteria.p__Firmicutes.c__Clostridia.o__Clostridiales.f__Eubacteriaceae.g__Eubacterium	L	4.20269	0.0340566
k__Bacteria.p__Firmicutes.c__Clostridia.o__Clostridiales.f__Eubacteriaceae.g__Eubacterium.s__Eubacteriumsp_Marseille_P5640	L	2.37086	0.0345604
k__Bacteria.p__Firmicutes.c__Clostridia.o__Clostridiales.f__Eubacteriaceae.g__Eubacterium.s__Eubacteriumsp_OM08_24	L	2.5453	0.018351
k__Bacteria.p__Firmicutes.c__Clostridia.o__Clostridiales.f__Eubacteriaceae.g__Eubacterium.s__Eubacteriumsp_TM06_47	L	2.58008	0.0160486
k__Bacteria.p__Firmicutes.c__Clostridia.o__Clostridiales.f__Lachnospiraceae	L	4.02744	0.0191124
k__Bacteria.p__Firmicutes.c__Clostridia.o__Clostridiales.f__Lachnospiraceae.g__Anaerostipes.s__Anaerostipeshadrus	L	2.14073	0.0444238
k__Bacteria.p__Firmicutes.c__Clostridia.o__Clostridiales.f__Lachnospiraceae.g__Blautia.s___Ruminococcus_torques	L	2.95664	0.0307167
k__Bacteria.p__Firmicutes.c__Clostridia.o__Clostridiales.f__Lachnospiraceae.g__Blautia.s__Blautiasp_KGMB01111	L	2.11828	0.041665
k__Bacteria.p__Firmicutes.c__Clostridia.o__Clostridiales.f__Lachnospiraceae.g__Coprococcus.s__Coprococcuscatus	L	3.0529	0.0303513
k__Bacteria.p__Firmicutes.c__Clostridia.o__Clostridiales.f__Lachnospiraceae.g__Coprococcus.s__Coprococcussp_AF16_22	L	2.01671	0.0345604
k__Bacteria.p__Firmicutes.c__Clostridia.o__Clostridiales.f__Lachnospiraceae.g__Coprococcus.s__Coprococcussp_AF18_48	L	2.5389	0.0345604
k__Bacteria.p__Firmicutes.c__Clostridia.o__Clostridiales.f__Lachnospiraceae.g__Fusicatenibacter	L	2.1133	0.0132779
k__Bacteria.p__Firmicutes.c__Clostridia.o__Clostridiales.f__Lachnospiraceae.g__Lachnoclostridium.s___Clostridium_symbiosum	L	2.35068	0.0182013
k__Bacteria.p__Firmicutes.c__Clostridia.o__Clostridiales.f__Lachnospiraceae.s__LachnospiraceaebacteriumAM21_21	L	2.01305	0.0345604
k__Bacteria.p__Firmicutes.c__Clostridia.o__Clostridiales.f__Ruminococcaceae	L	4.68073	0.019096
k__Bacteria.p__Firmicutes.c__Clostridia.o__Clostridiales.f__Ruminococcaceae.g__Angelakisella	L	2.00346	0.0120041
k__Bacteria.p__Firmicutes.c__Clostridia.o__Clostridiales.f__Ruminococcaceae.g__Angelakisella.s__Angelakisellamassiliensis	L	2.00373	0.0120041
k__Bacteria.p__Firmicutes.c__Clostridia.o__Clostridiales.f__Ruminococcaceae.g__Ruminococcus.s__Ruminococcusbromii	L	2.28622	0.0464736
k__Bacteria.p__Firmicutes.c__Clostridia.o__Clostridiales.f__Ruminococcaceae.g__Ruminococcus.s__Ruminococcussp_AF21_11	L	2.31982	0.0345604
k__Bacteria.p__Firmicutes.c__Clostridia.o__Clostridiales.f__Ruminococcaceae.g__Ruminococcus.s__Ruminococcussp_AF37_20	L	2.14551	0.034491
k__Bacteria.p__Firmicutes.c__Clostridia.o__Clostridiales.f__Ruminococcaceae.g__Ruminococcus.s__Ruminococcussp_AM42_10AC	L	2.15807	0.0345604
k__Bacteria.p__Firmicutes.c__Clostridia.o__Clostridiales.f__Ruminococcaceae.g__Ruthenibacterium	L	3.15745	0.0153553
k__Bacteria.p__Firmicutes.c__Clostridia.o__Clostridiales.f__Ruminococcaceae.g__Ruthenibacterium.s__Ruthenibacteriumlactatiformans	L	3.15745	0.0153553
k__Bacteria.p__Firmicutes.c__Clostridia.o__Clostridiales.f__Ruminococcaceae.g__Subdoligranulum.s__Subdoligranulumsp_OF01_18	L	2.41337	0.0364538
k__Bacteria.p__Firmicutes.c__Clostridia.o__Clostridiales.f__Ruminococcaceae.s__RuminococcaceaebacteriumCPB6	L	2.58558	0.0345604
k__Bacteria.p__Firmicutes.c__Clostridia.o__Clostridiales.f__Ruminococcaceae.s__RuminococcaceaebacteriumTF06_43	L	2.72562	0.0324912
k__Bacteria.p__Firmicutes.c__Negativicutes.o__Veillonellales.f__Veillonellaceae.g__Veillonella.s__Veillonellasp_DORA_B_18_19_23	L	2.03236	0.0345604
k__Bacteria.p__Planctomycetes.c__CandidatusBrocadiae.o__CandidatusBrocadiales.f__CandidatusBrocadiaceae	L	2.45372	0.0345604
k__Bacteria.p__Proteobacteria	L	3.79989	0.00379516
k__Bacteria.p__Proteobacteria.c__Betaproteobacteria.o__Rhodocyclales	L	2.36407	0.0160486
k__Bacteria.p__Proteobacteria.c__Gammaproteobacteria.o__Enterobacterales	L	3.91212	0.00340535
k__Bacteria.p__Proteobacteria.c__Gammaproteobacteria.o__Enterobacterales.f__Enterobacteriaceae	L	3.78287	0.00878132
k__Bacteria.p__Actinobacteria.c__Actinobacteria.o__Actinomycetales.f__Actinomycetaceae.g__Mobiluncus	S	2.74886	0.0132779
k__Bacteria.p__Actinobacteria.c__Actinobacteria.o__Actinomycetales.f__Actinomycetaceae.g__Mobiluncus.s__Mobiluncuscurtisii	S	3.82787	0.0126618
k__Bacteria.p__Actinobacteria.c__Actinobacteria.o__Actinomycetales.f__Actinomycetaceae.g__Mobiluncus.s__Mobiluncusmulieris	S	2.16189	0.0464736
k__Bacteria.p__Actinobacteria.c__Actinobacteria.o__Propionibacteriales.f__Nocardioidaceae.g__Nocardioides	S	2.80273	0.0160486
k__Bacteria.p__Bacteroidetes.c__Bacteroidia.o__Bacteroidales.f__Bacteroidaceae.g__Bacteroides.s__Bacteroidessp_14_A_	S	2.28511	0.0345604
k__Bacteria.p__Bacteroidetes.c__Bacteroidia.o__Bacteroidales.f__Bacteroidaceae.g__Bacteroides.s__Bacteroidessp_AR29	S	2.05725	0.00718245
k__Bacteria.p__Bacteroidetes.c__Bacteroidia.o__Bacteroidales.f__Bacteroidaceae.g__Bacteroides.s__CandidatusBacteroidesperiocalifornicus	S	2.80665	0.0160486
k__Bacteria.p__Bacteroidetes.c__Bacteroidia.o__Bacteroidales.f__Dysgonamonadaceae.g__Proteiniphilum.s__Proteiniphilumsaccharofermentans	S	2.17233	0.0160486
k__Bacteria.p__Bacteroidetes.c__Bacteroidia.o__Bacteroidales.f__Porphyromonadaceae.g__Porphyromonas.s__Porphyromonasbennonis	S	3.18107	0.0497396
k__Bacteria.p__Bacteroidetes.c__Bacteroidia.o__Bacteroidales.f__Porphyromonadaceae.g__Porphyromonas.s__Porphyromonasendodontalis	S	2.34893	0.011107
k__Bacteria.p__Bacteroidetes.c__Bacteroidia.o__Bacteroidales.f__Porphyromonadaceae.g__Porphyromonas.s__Porphyromonassp_COT_239OH1446	S	2.4121	0.0345604
k__Bacteria.p__Bacteroidetes.c__Bacteroidia.o__Bacteroidales.f__Porphyromonadaceae.g__Porphyromonas.s__Porphyromonassp_HMSC065F10	S	2.65219	0.034303
k__Bacteria.p__Bacteroidetes.c__Bacteroidia.o__Bacteroidales.f__Porphyromonadaceae.g__Porphyromonas.s__Porphyromonasuenonis	S	3.48255	0.0481524
k__Bacteria.p__Bacteroidetes.c__Bacteroidia.o__Bacteroidales.f__Porphyromonadaceae.s__PorphyromonadaceaebacteriumFC4	S	2.07503	0.016359
k__Bacteria.p__Bacteroidetes.c__Bacteroidia.o__Bacteroidales.f__Prevotellaceae.g__Prevotella.s__Prevotellabuccalis	S	3.22349	0.0148687
k__Bacteria.p__Bacteroidetes.c__Bacteroidia.o__Bacteroidales.f__Prevotellaceae.g__Prevotella.s__Prevotellatimonensis	S	4.34177	0.0386467
k__Bacteria.p__Bacteroidetes.c__Bacteroidia.o__Bacteroidales.s__BacteroidalesbacteriumKA00251	S	3.50455	0.0185409
k__Bacteria.p__Firmicutes.c__Bacilli.o__Bacillales.f__Bacillaceae.g__Bacillus.s__Bacilluscereus	S	2.25187	0.0408209
k__Bacteria.p__Firmicutes.c__Clostridia.o__Clostridiales.f__Clostridiaceae.g__Hungatella	S	3.70245	0.0419517
k__Bacteria.p__Firmicutes.c__Clostridia.o__Clostridiales.f__ClostridialesFamilyXIII_IncertaeSedis	S	2.27254	0.00805751
k__Bacteria.p__Firmicutes.c__Clostridia.o__Clostridiales.f__ClostridialesFamilyXIII_IncertaeSedis.g__Alterileibacterium	S	2.60266	0.00228357
k__Bacteria.p__Firmicutes.c__Clostridia.o__Clostridiales.f__ClostridialesFamilyXIII_IncertaeSedis.g__Alterileibacterium.s__Alterileibacteriummassiliense	S	2.60241	0.00228357
k__Bacteria.p__Firmicutes.c__Clostridia.o__Clostridiales.f__ClostridialesFamilyXIII_IncertaeSedis.s__ClostridialesbacteriumS5_A14a	S	3.84857	0.0239692
k__Bacteria.p__Firmicutes.c__Clostridia.o__Clostridiales.f__Lachnospiraceae.g__Blautia.s__Blautiasp_An46	S	2.02206	0.0160486
k__Bacteria.p__Firmicutes.c__Clostridia.o__Clostridiales.f__Lachnospiraceae.g__Lachnoanaerobaculum.s__Lachnoanaerobaculumsp_ICM7	S	2.26657	0.0345604
k__Bacteria.p__Firmicutes.c__Clostridia.o__Clostridiales.f__Peptostreptococcaceae.s__Peptostreptococcaceaebacteriumoraltaxon113	S	2.94895	0.0331218
k__Bacteria.p__Firmicutes.c__Clostridia.o__Clostridiales.f__Peptostreptococcaceae.s__Peptostreptococcaceaebacteriumoraltaxon929	S	2.37054	0.0185409
k__Bacteria.p__Firmicutes.c__Clostridia.o__Clostridiales.f__Ruminococcaceae.g__Ruminococcus.s__Ruminococcussp_AF41_9	S	2.13644	0.0444258
k__Bacteria.p__Firmicutes.c__Clostridia.o__Clostridiales.g__Levyella	S	3.30307	0.0431658
k__Bacteria.p__Firmicutes.c__Clostridia.o__Clostridiales.g__Levyella.s__Levyellamassiliensis	S	3.30307	0.0431658
k__Bacteria.p__Firmicutes.c__Clostridia.o__Clostridiales.s__ClostridialesbacteriumKA00134	S	2.45392	0.0059254
k__Bacteria.p__Firmicutes.c__Clostridia.o__Clostridiales.s__ClostridialesbacteriumMarseille_P2986	S	2.74823	0.00437196
k__Bacteria.p__Firmicutes.c__Erysipelotrichia.o__Erysipelotrichales.f__Erysipelotrichaceae.g__Erysipelatoclostridium.s___Clostridium_spiroforme	S	2.63893	0.041976
k__Bacteria.p__Firmicutes.c__Tissierellia	S	4.40296	0.0114888
k__Bacteria.p__Firmicutes.c__Tissierellia.g__Ezakiella	S	4.02235	0.011107
k__Bacteria.p__Firmicutes.c__Tissierellia.g__Ezakiella.s__Ezakiellamassiliensis	S	2.4893	0.0444238
k__Bacteria.p__Firmicutes.c__Tissierellia.o__Tissierellales.f__Peptoniphilaceae	S	3.24197	0.043179
k__Bacteria.p__Firmicutes.c__Tissierellia.o__Tissierellales.f__Peptoniphilaceae.g__Anaerococcus.s__Anaerococcustetradius	S	2.54778	0.00594566
k__Bacteria.p__Firmicutes.c__Tissierellia.o__Tissierellales.f__Peptoniphilaceae.g__Murdochiella	S	3.77227	0.024641
k__Bacteria.p__Firmicutes.c__Tissierellia.o__Tissierellales.f__Peptoniphilaceae.g__Peptoniphilus.s__Peptoniphilusduerdenii	S	2.38264	0.0026178
k__Bacteria.p__Firmicutes.c__Tissierellia.o__Tissierellales.f__Peptoniphilaceae.g__Peptoniphilus.s__Peptoniphilussp_BV3AC2	S	2.49524	0.0067317
k__Bacteria.p__Firmicutes.c__Tissierellia.s___Bacteroides_coagulans	S	2.65828	0.00451965
k__Bacteria.p__Firmicutes.c__Tissierellia.s__TissierelliabacteriumS5_A11	S	2.05316	0.0399239
k__Bacteria.p__Firmicutes.c__Tissierellia.s__TissierelliabacteriumS7_1_4	S	2.75976	0.00202219
k__Bacteria.p__Proteobacteria.c__Epsilonproteobacteria.o__Campylobacterales.f__Campylobacteraceae.g__Campylobacter.s__Campylobactergracilis	S	2.01757	0.0254107
k__Bacteria.p__Proteobacteria.c__Gammaproteobacteria.o__Alteromonadales.f__Alteromonadaceae	S	2.40292	0.0345604
k__Bacteria.p__Spirochaetes.c__Spirochaetia.o__Spirochaetales.f__Spirochaetaceae.g__Treponema.s__Treponemapedis	S	2.36064	0.0160486
k__Bacteria.p__Spirochaetes.c__Spirochaetia.o__Spirochaetales.f__Spirochaetaceae.g__Treponema.s__Treponemasp_	S	2.76314	0.0345604
